# Supplementary material
Source: publisher figshare collection journal article supplement (https://karger.figshare.com/articles/dataset/_/12017724)
Supplement: Supplementary file 1 [file 1]

**Table 1. Changes in psychotropic medication and correlations with PTSD symptom severity**

|                                               | 3MDR (n=22)    |      | NTCC (n=21)    |      | Correlation to CAPS-5<br>change T0-T3 |     |
|-----------------------------------------------|----------------|------|----------------|------|---------------------------------------|-----|
|                                               | n              | %    | n              | %    | r                                     | p   |
| Discontinuation of psychotropic medication    | 1 <sup>a</sup> | 4.5  | 0              | 0    | .23                                   | .17 |
| Increased dosage of psychotropic medication   | 1 <sup>b</sup> | 4.5  | 2 <sup>c</sup> | 9.5  | .05                                   | .76 |
| Start psychotropic medication treatment       | 1 <sup>d</sup> | 4.5  | 1 <sup>e</sup> | 4.8  | .24                                   | .14 |
| Any type of change in psychotropic medication | 3              | 13.6 | 3              | 14.3 | .29                                   | .08 |

*Note.* Point-biserial correlation coefficient (r) and corresponding p-value. No significant correlations. <sup>a</sup> Discontinuation of benzodiazepine and SSRI. <sup>b</sup> SSRI increased dosage. <sup>c</sup> Increase dosage of antipsychotic (one patient) and benzodiazepine (one patient). <sup>d</sup> Started SSRI. <sup>e</sup> Started benzodiazepine.
